# Supplementary material for: The Effect of pH and Storage Temperature on the Stability of Emulsions Stabilized by Rapeseed Proteins
Source: MDPI journal article supplement (doi:10.3390/foods10071657), 2021-07-18
Supplement: s1 [file s1]

---

## Supplementary material

# The effect of emulsion pH and storage temperature on emulsion stability stabilized by rapeseed protein precipitated at different pH

Karolina Östbring <sup>1\*</sup>, María Matos<sup>2</sup>, Ali Marefati<sup>1</sup>, Cecilia Ahlström<sup>1</sup>, and Gemma Gutiérrez<sup>2</sup>

<sup>1</sup> Department of Food Technology Engineering and Nutrition, Faculty of Engineering, Lund University, P.O. Box 124, 221 00 Lund, Sweden; ali.marefati@food.lth.se (A.M.); cecilia.ahlstrom@food.lth.se (C.A.)

<sup>2</sup> Department of Chemical and Environmental Engineering, University of Oviedo, Julián Clavería 8, 33006 Oviedo, Spain;

matosmaria@uniovi.es (M.M.); gutierrezgemma@uniovi.es (G.G.)

\* Correspondence: karolina.ostbring@food.lth.se

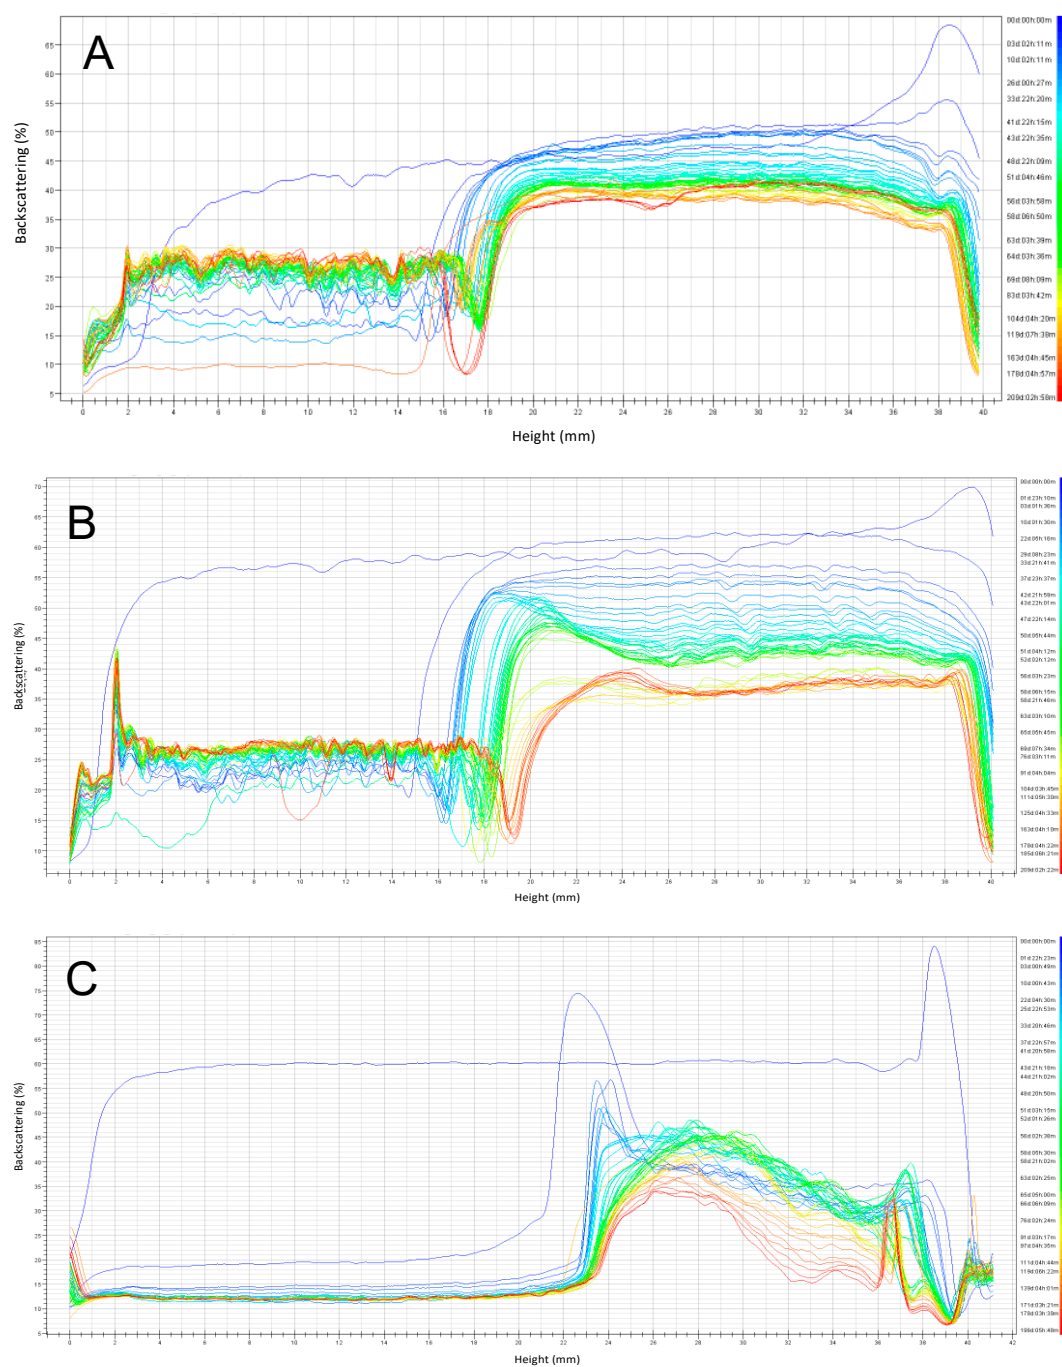

**Figure S1.** Emulsion backscattering profiles prepared at pH 4.5 and stored for six months at 4°C. (A) Emulsion stabilized by RPP3 (B) Emulsion stabilized by RPP6.5, (C) Emulsion stabilized by soy lecithin.

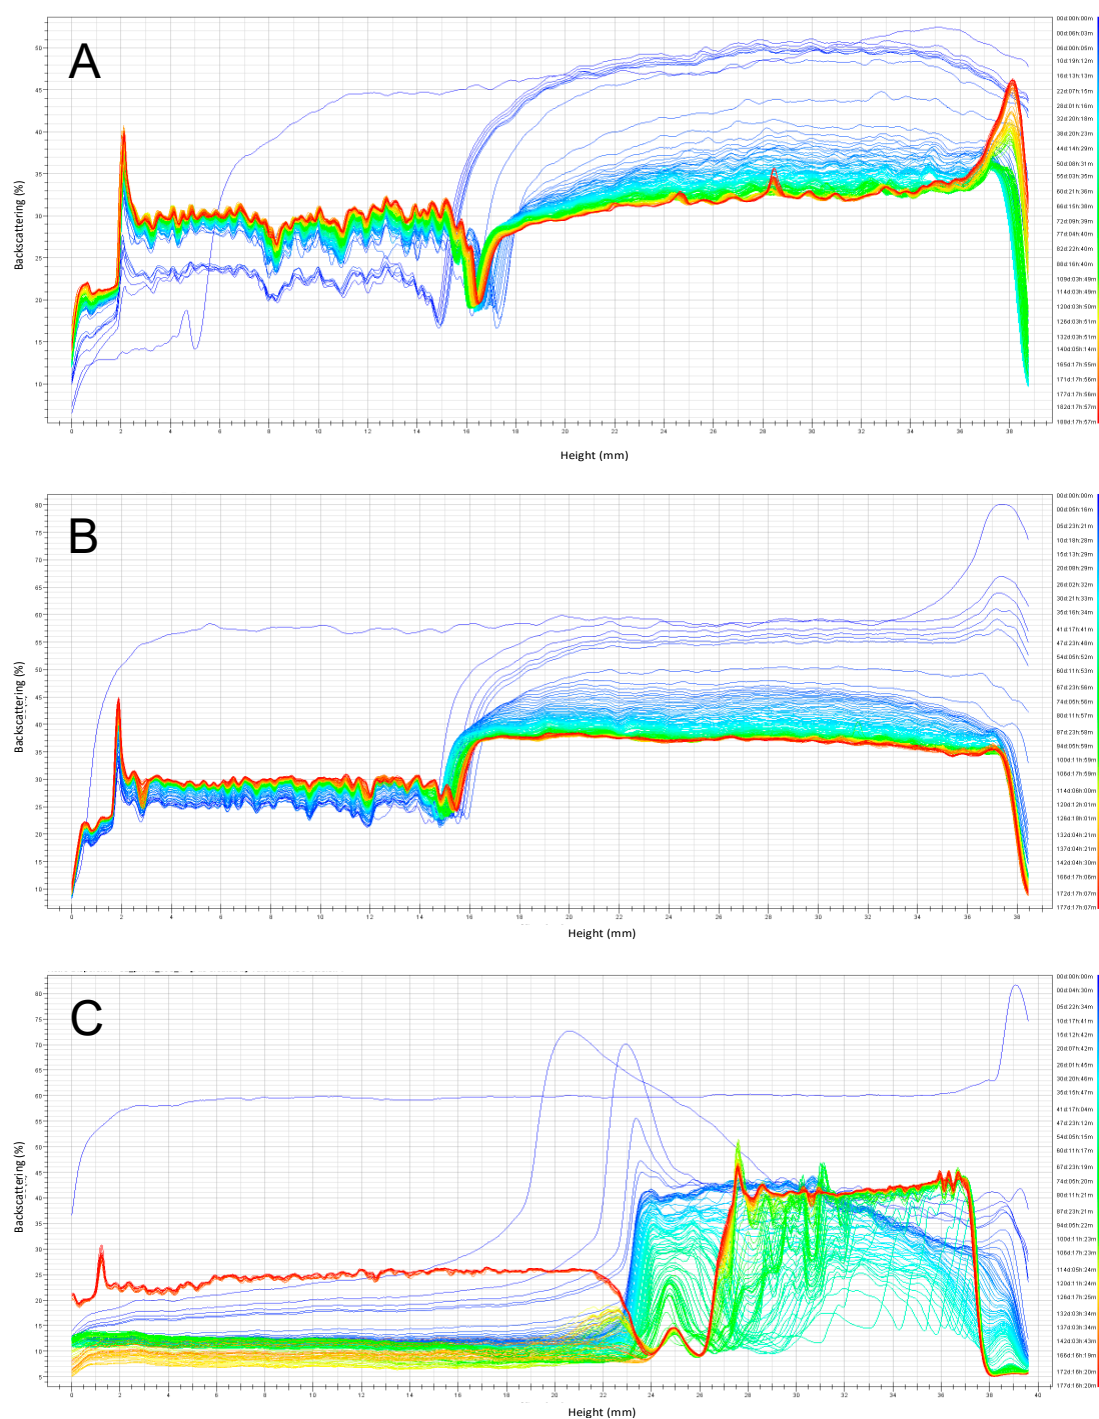

**Figure S2.** Emulsion backscattering profiles prepared at pH 4.5 and stored for six months at 30°C. (A) Emulsion stabilized by RPP3 (B) Emulsion stabilized by RPP6.5, (C) Emulsion stabilized by soy lecithin.
